# Supplementary material for: Cyclin D1 Serves as a Poor Prognostic Biomarker in Stage I Gastric Cancer
Source: MDPI journal article supplement (doi:10.3390/cimb44030093), 2022-03-20
Supplement: s1 [file s1]

**Table S1.** Baseline characteristics of patients after propensity score matching.

|                                      | Cyclin D1-negative<br>(n=61) | Cyclin D1-positive<br>(n=61) | <i>p</i> |
|--------------------------------------|------------------------------|------------------------------|----------|
| Median (IQR) age, years              | 64 (54-68)                   | 64 (54-70)                   | 0.608    |
| Sex                                  |                              |                              | 0.258    |
| Male                                 | 36 (59.0)                    | 42 (68.9)                    |          |
| Female                               | 25 (41.0)                    | 19 (31.2)                    |          |
| Location                             |                              |                              | 0.045    |
| Upper                                | 3 (4.9)                      | 12 (19.7)                    |          |
| Middle                               | 13 (21.3)                    | 12 (19.7)                    |          |
| Lower                                | 45 (73.8)                    | 37 (60.7)                    |          |
| Operation                            |                              |                              | 0.454    |
| Subtotal gastrectomy                 | 43 (70.5)                    | 41 (67.2)                    |          |
| Total gastrectomy                    | 12 (19.7)                    | 16 (26.2)                    |          |
| Proximal gastrectomy                 | 6 (9.8)                      | 3 (4.9)                      |          |
| Wedge resection                      | 0 (0.0)                      | 1 (1.6)                      |          |
| Depth of invasion                    |                              |                              | 0.856    |
| EGC                                  | 33 (54.1)                    | 32 (52.5)                    |          |
| AGC                                  | 28 (45.9)                    | 29 (47.5)                    |          |
| Nodal status                         |                              |                              | >0.998   |
| N0                                   | 39 (63.9)                    | 39 (63.9)                    |          |
| N+                                   | 22 (36.1)                    | 22 (36.1)                    |          |
| AJCC 8 <sup>th</sup> edition staging |                              |                              | >0.998   |
| I                                    | 35 (57.4)                    | 35 (57.4)                    |          |
| II                                   | 16 (26.2)                    | 16 (26.2)                    |          |
| III                                  | 10 (16.4)                    | 10 (16.4)                    |          |
| Tumor size                           |                              |                              | 0.586    |
| ≤4 cm                                | 30 (49.2)                    | 27 (44.3)                    |          |
| >4 cm                                | 31 (50.8)                    | 34 (55.7)                    |          |
| WHO classification                   |                              |                              | >0.998   |
| Well-differentiated                  | 10 (16.4)                    | 10 (16.4)                    |          |
| Moderately-differentiated            | 21 (34.4)                    | 21 (34.4)                    |          |
| Poorly-differentiated and others*    | 30 (49.2)                    | 30 (49.2)                    |          |

|                       |           |           |        |
|-----------------------|-----------|-----------|--------|
| Lauren classification |           |           | >0.998 |
| Intestinal            | 47 (77.1) | 47 (77.1) |        |
| Diffuse or mixed      | 14 (23.0) | 14 (23.0) |        |

IQR: interquartile range; EGC: early gastric cancer; AGC: advanced gastric cancer; AJCC: American Joint Committee on Cancer.

\*Undifferentiated and mucinous adenocarcinoma, and signet-ring cell carcinoma were included.

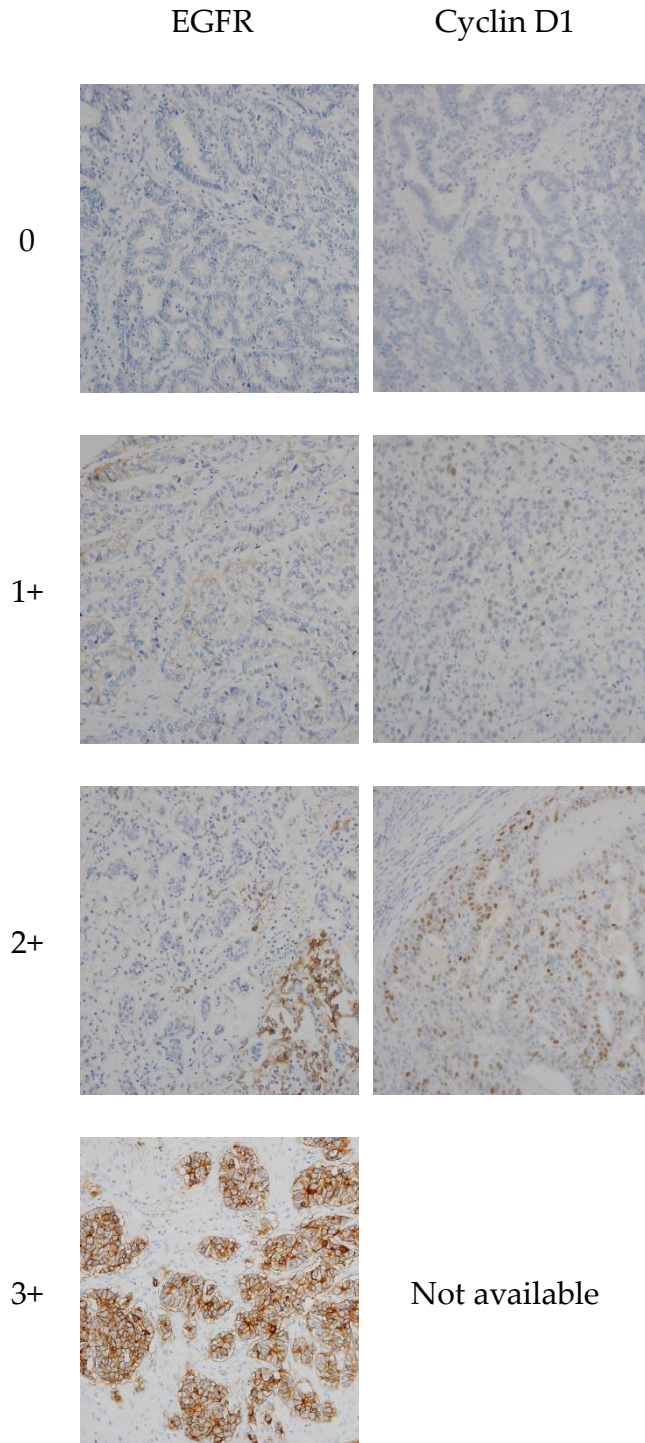

**Figure S1.** Representative findings of immunohistochemical staining for the biomarkers in gastric cancer cells ( $\times 200$ ). The definitions of 0 (negative), 1+, 2+ and 3+ were  $<1\%$ , 1-20%, 21-50%, and  $>50\%$  of tumor cells stained, respectively.

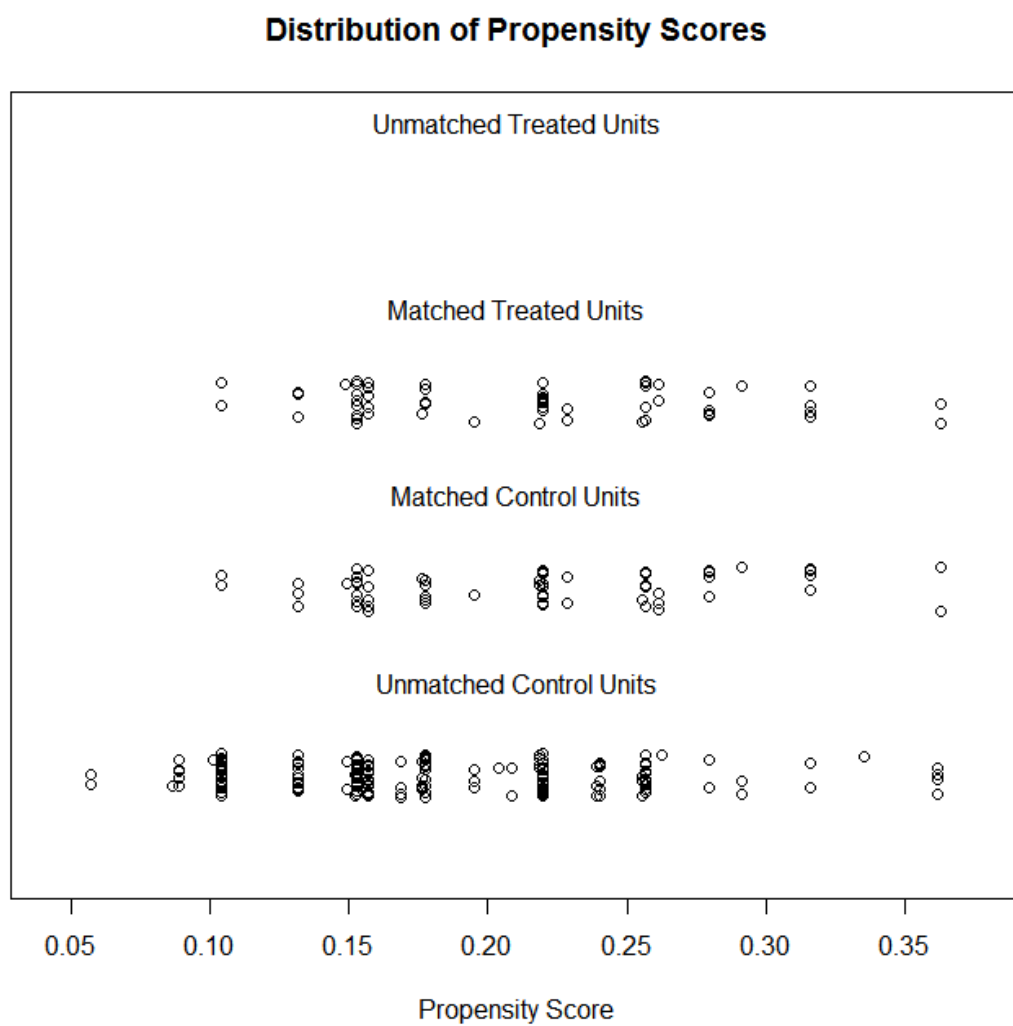

**Figure S2.** Jitter plot to assess the distribution of propensity scores.
